# Supplementary material for: Lentivirus-Carried microRNA-195 Rescues Memory Deficits of Alzheimer’s Disease Transgenic Mouse by Attenuating the Generation of Amyloid Plaques
Source: Frontiers journal article supplement (doi:10.3389/fphar.2021.633805), 2021-04-26
Supplement: Data_Sheet_1.pdf [file Data_Sheet_1.pdf]

Figure 6A APP Hippo

- 1 WT
  - 2 APP/PS1+Lv-NC
  - 3 APP/PS1+Lv-pre-miR-195
- Figure 6A APP Hippo

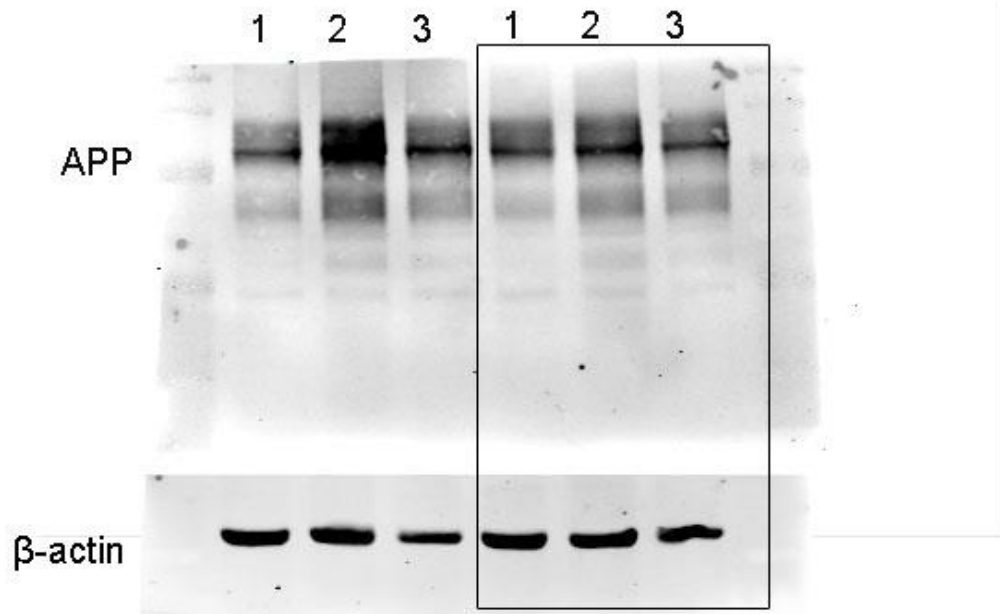



Figure 6B BACE1 Hippo

- 1 WT
- 2 APP/PS1+Lv-NC
- 3 APP/PS1+Lv-pre-miR-195

Figure 6B BACE1 HIPPO

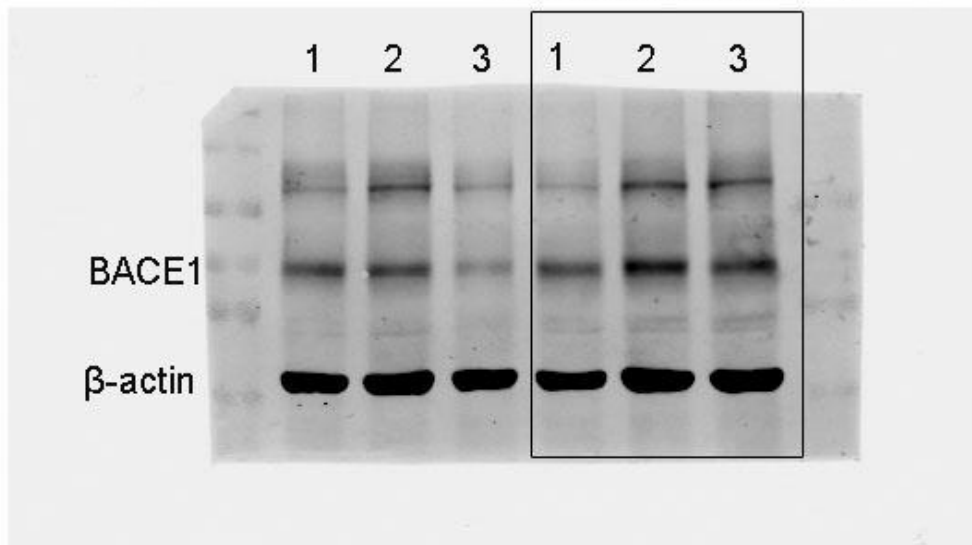

Figure 6B BACE1 Temp

- 1 WT
- 2 APP/PS1+Lv-NC
- 3 APP/PS1+Lv-pre-miR-195

Figure 6B BACE1 Temp

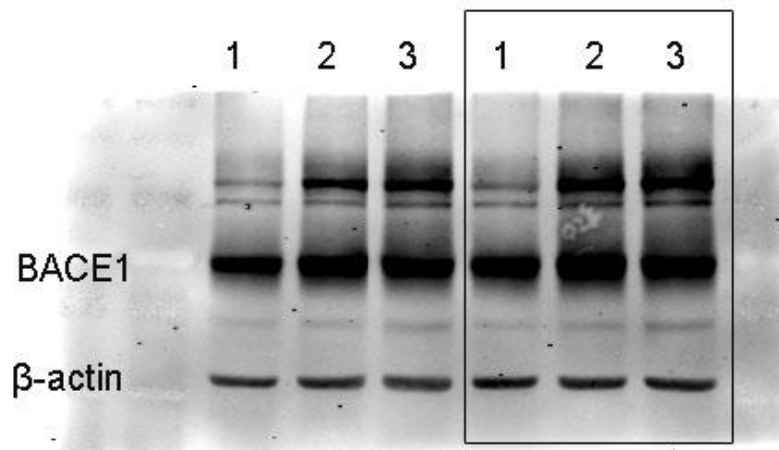

Figure 6C AT8 Hippo

- 1 WT
- 2 APP/PS1+Lv-NC
- 3 APP/PS1+Lv-pre-miR-195

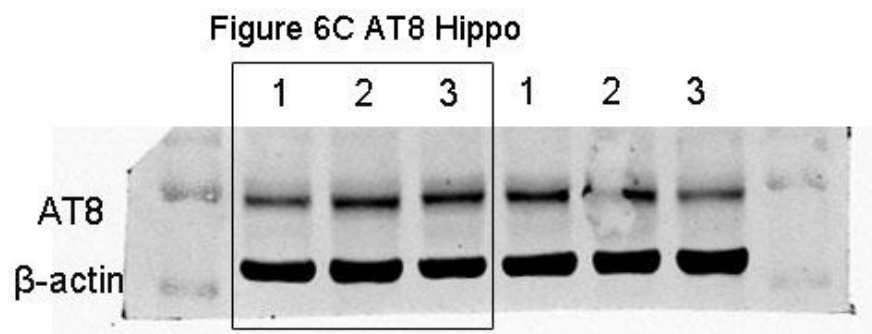

Figure 6C 7C AT8 Temp

- 1 WT
- 2 APP/PS1+Lv-NC
- 3 APP/PS1+Lv-pre-miR-195

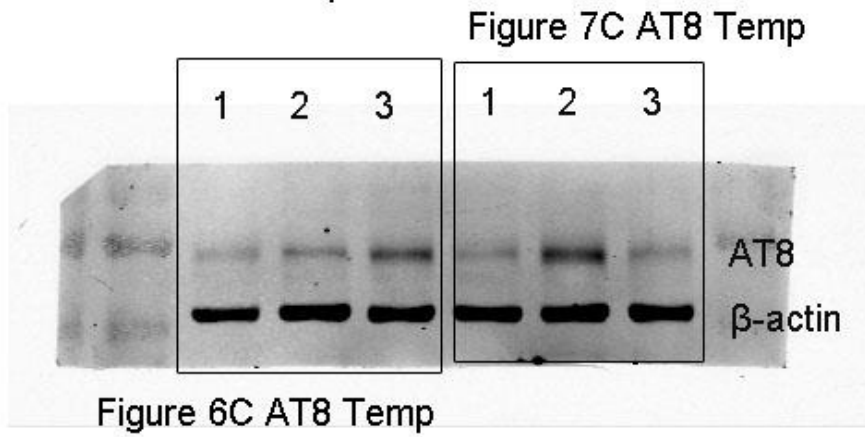

Figure 7A APP Hippo

- 1 WT
- 2 APP/PS1+Lv-NC
- 3 APP/PS1+Lv-pre-miR-195

Figure 7A APP Hippo

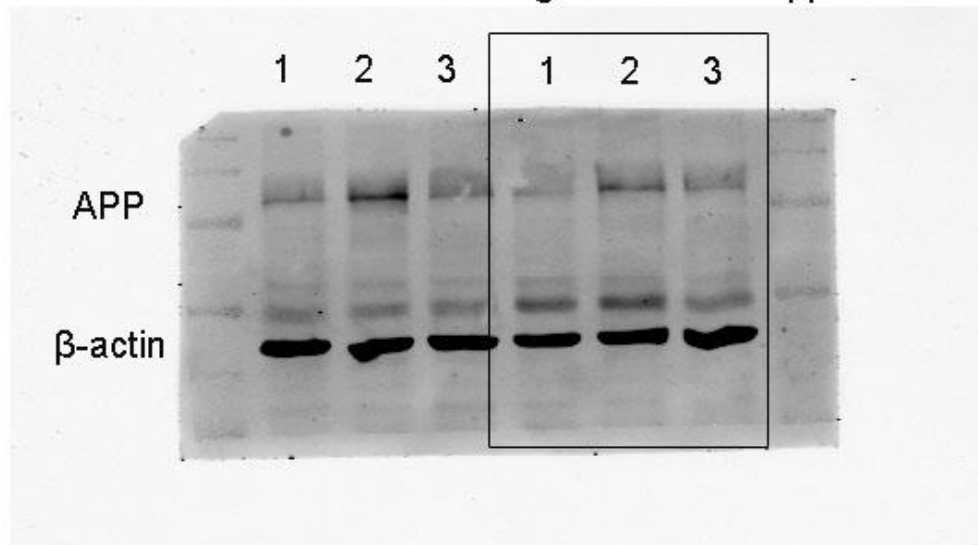

Figure 7A APP Temp

- 1 WT
- 2 APP/PS1+Lv-NC
- 3 APP/PS1+Lv-pre-miR-195

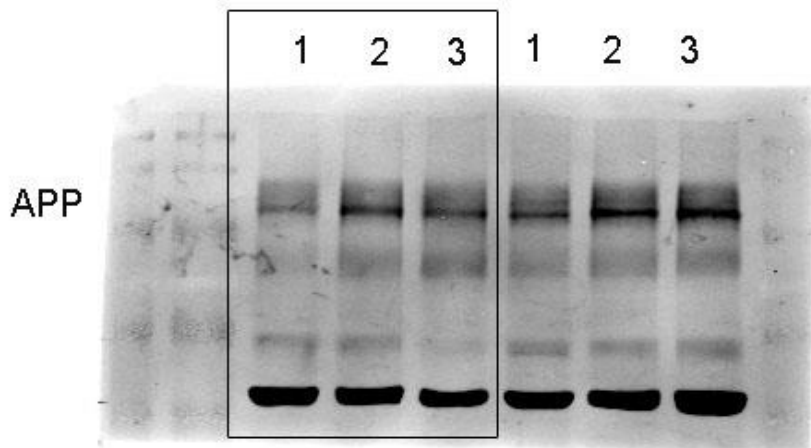

Figure 7A APP Temp



Figure 7B BACE1 Hippo

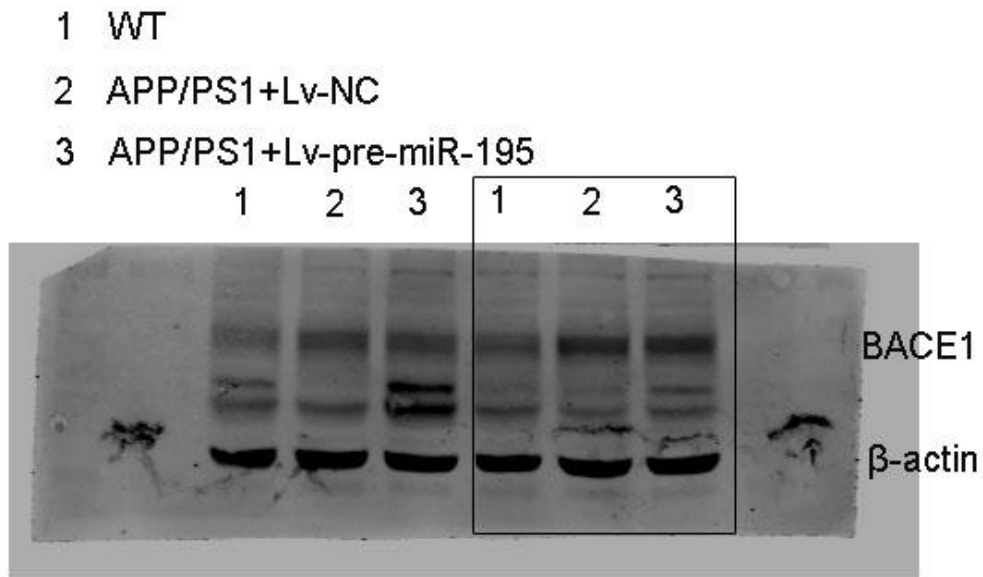

Figure 7B BACE1 Hippo

Figure 7B BACE1 Temp

- 1 WT
- 2 APP/PS1+Lv-NC
- 3 APP/PS1+Lv-pre-miR-195

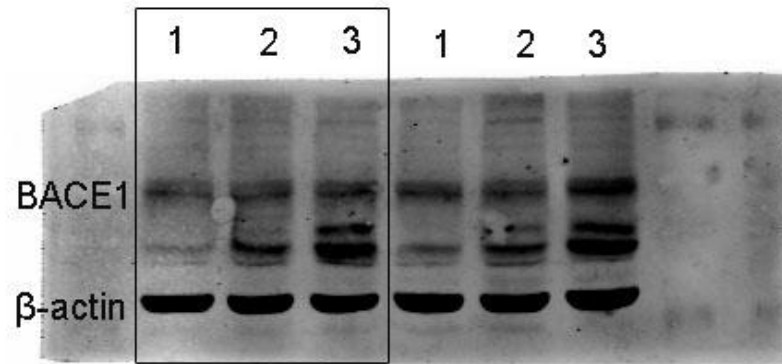

Figure 7B BACE1 Temp

Figure 7C AT8 Hippo

- 1 WT
- 2 APP/PS1+Lv-NC
- 3 APP/PS1+Lv-pre-miR-195

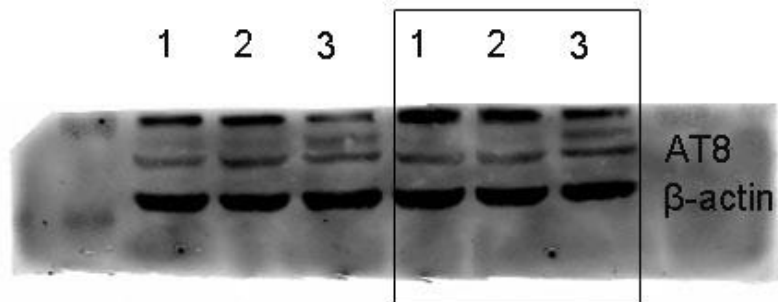

Figure 7C AT8 Hippo
